# Supplementary material for: A preliminary evaluation of the training effects of a didactic and simulation-based psychological first aid program in students and school counselors in South Korea
Source: PubMed Central journal article supplement (PMC5513559; doi:10.1371/journal.pone.0181271), 2017-07-17
Supplement: pone.0181271.s005.pdf [file pone.0181271.s005.pdf]

## Supporting Information S2 Behavioral Checklists

### 1. Common Checklist for the Survivor

※ The following is a list of actions psychological personnel must do during psychological first aid.  
- Fill in the ID of the psychological worker you met in the blank space on the right and evaluate their behavior towards you.

| Common Checklist                                                                                                                                                                                                       | psychological worker 1 |    | psychological worker 2 |    | psychological worker 3 |    |
|------------------------------------------------------------------------------------------------------------------------------------------------------------------------------------------------------------------------|------------------------|----|------------------------|----|------------------------|----|
|                                                                                                                                                                                                                        | YES                    | NO | YES                    | NO | YES                    | NO |
| When first meeting with the survivor, did they mention their name, affiliation, role, and purpose of the visit?                                                                                                        |                        |    |                        |    |                        |    |
| Did they ask for permission to speak with you?                                                                                                                                                                         |                        |    |                        |    |                        |    |
| Did they ask distinguishing information about the survivor (e.g., “What’s your name?” “How should I refer to you?” etc.)?                                                                                              |                        |    |                        |    |                        |    |
| Did they ask whether you needed anything?                                                                                                                                                                              |                        |    |                        |    |                        |    |
| Did they ask how the situation has been until now?                                                                                                                                                                     |                        |    |                        |    |                        |    |
| Did they provide help that would comfort a suffering person (e.g., providing information at the scene related to the rescue, or providing tissues, water, or drinks when needed)?                                      |                        |    |                        |    |                        |    |
| Did they let the survivor know they were listening by nodding their head or positively responding to the survivor while they were speaking?                                                                            |                        |    |                        |    |                        |    |
| Did they understand the survivor’s feelings and respond empathetically?                                                                                                                                                |                        |    |                        |    |                        |    |
| If the survivor was searching for someone, did the psychological personnel member ask for distinguishing information about that person (e.g., “What is that person’s name?” “What are their physical features?” etc.)? |                        |    |                        |    |                        |    |
| Did they provide feedback about the things you did that were suitable in a disaster situation (e.g., quickly taking refuge, asking for help, helping others, etc.)?                                                    |                        |    |                        |    |                        |    |
| Did they answer the survivor’s questions based on all the facts?                                                                                                                                                       |                        |    |                        |    |                        |    |

※ Please list any of the psychological worker's actions not mentioned above that you thought were helpful, and actions you thought were not helpful.

| Things that were helpful | Things that were not helpful |
|--------------------------|------------------------------|
|                          |                              |

## 2. Common Checklist for Psychological Personnel

※ The following is a list of actions psychological personnel must do during psychological first aid.  
 - Please fill out the characteristics of the survivor you met in the blank space on the right, and evaluate their behavior towards you.

| Common Checklist                                                                                                                                                                        | Survivor 1 |    | Survivor 2 |    | Survivor 3 |    |
|-----------------------------------------------------------------------------------------------------------------------------------------------------------------------------------------|------------|----|------------|----|------------|----|
|                                                                                                                                                                                         | YES        | NO | YES        | NO | YES        | NO |
| When meeting the survivor for the first time, did you introduce your name, affiliation, role, and purpose of visit?                                                                     |            |    |            |    |            |    |
| Did you ask permission to speak with them?                                                                                                                                              |            |    |            |    |            |    |
| Did you ask for distinguishing information about the survivor (e.g., “What is your name?” “How should I refer to you?” etc.)?                                                           |            |    |            |    |            |    |
| Did you ask whether they needed anything?                                                                                                                                               |            |    |            |    |            |    |
| Did you ask how the situation has been until now?                                                                                                                                       |            |    |            |    |            |    |
| Did you provide help that would comfort a suffering person (e.g., providing information at the scene related to the rescue, or tissues, water, or drinks when needed?)?                 |            |    |            |    |            |    |
| Did you let the survivor know you were listening by nodding your head or positively responding to them while they were speaking?                                                        |            |    |            |    |            |    |
| Did you understand the survivor’s feelings and respond empathetically?                                                                                                                  |            |    |            |    |            |    |
| If the survivor was searching for someone, did you ask for distinguishing information about that person (e.g., “What is that person’s name?” “What are their physical features?” etc.)? |            |    |            |    |            |    |
| Did you provide feedback about the things the survivor did that were suitable in a disaster situation (e.g., taking refuge quickly, asking for help, helping others, etc.)?             |            |    |            |    |            |    |
| Did you answer the survivor’s questions based on all the facts?                                                                                                                         |            |    |            |    |            |    |

※ Please list any of the psychological worker's actions not mentioned above that you thought were helpful, and actions you think were not helpful.

| Things that were helpful | Things that were not helpful |
|--------------------------|------------------------------|
|                          |                              |

### 3. Team-Building Checklist

※ The following is a list of actions psychological personnel must do in the team-building process of psychological first aid. From a leader's perspective, please evaluate whether our team carried out the actions below.

| Common Checklist        |                                                                                                                                                                                       | YES | NO |
|-------------------------|---------------------------------------------------------------------------------------------------------------------------------------------------------------------------------------|-----|----|
| Team-building & mission | Did everyone share his/her disaster countermeasures experience?                                                                                                                       |     |    |
|                         | Did everyone share their educational experience related to disasters?                                                                                                                 |     |    |
|                         | Did the team determine the leader based on appropriate standards?                                                                                                                     |     |    |
|                         | Was the basic spirit of psychological first aid or mission shared in the meeting process?                                                                                             |     |    |
| Resources               | Did the team distribute the space in a manner that was appropriate for the situation (situation headquarters, providing drinks, providing information, rest area for children, etc.)? |     |    |
|                         | Did the team determine the materials they could use?                                                                                                                                  |     |    |
|                         | Did the team efficiently allocate materials in a manner that was appropriate to the situation of the rest area?                                                                       |     |    |
| Role                    | Did everyone share information about the role he/she took on?                                                                                                                         |     |    |
|                         | Did those with similar roles gather and share the progress of their work?                                                                                                             |     |    |
|                         | Is there person who took on the central role that covers the entire process?                                                                                                          |     |    |
| Method                  | Was the process of dividing team roles voluntary/democratic?                                                                                                                          |     |    |
|                         | Did the leader take initiative and perform a difficult role?                                                                                                                          |     |    |
| Providing Information   | Did the team share the basic practice of having to mention your name, affiliation, role, and purpose of the visit when meeting the survivor for the first time?                       |     |    |
|                         | Did the team explain the situation concisely?                                                                                                                                         |     |    |
|                         | Did the team talk about the guidelines of psychological first aid thoroughly?                                                                                                         |     |    |
| Process Factors         | At the beginning of providing service, did the leader or a responsible person give a briefing on the disaster situation?                                                              |     |    |

|                                        |                                                                                                                                                                 |  |  |
|----------------------------------------|-----------------------------------------------------------------------------------------------------------------------------------------------------------------|--|--|
| (Please observe during the simulation) | Were appropriate measures taken regarding the problem situation reported by team members (reporting activities, changing places, requesting information, etc.)? |  |  |
|                                        | Did the team determine the age and injury level of the survivor?                                                                                                |  |  |
|                                        | Did the team periodically check up on survivors who refused help?                                                                                               |  |  |
|                                        | Did the team control the media to protect the survivors?                                                                                                        |  |  |

Other observations:

Strengths and weaknesses of the team-building process:

#### 4. Individual Case Checklist Examples (Earthquake)

| Survivor 1                                                                                                                       |                          |                          |                          |
|----------------------------------------------------------------------------------------------------------------------------------|--------------------------|--------------------------|--------------------------|
| A is a 10-year-old girl. Her mother tries to comfort her, but A will not stop crying.                                            |                          |                          |                          |
| Survivor 1 Checklist                                                                                                             | YES                      | NO                       | Extra Points             |
| Did the psychological worker ask for permission from the mother (Ms. B) to speak with A?                                         | <input type="checkbox"/> | <input type="checkbox"/> | <input type="checkbox"/> |
| Did the psychological worker attempt to converse with A at a level she could comprehend?                                         | <input type="checkbox"/> | <input type="checkbox"/> | <input type="checkbox"/> |
| Did the psychological worker direct A to a place where she could spend time safely (e.g., a place where she could play or draw)? | <input type="checkbox"/> | <input type="checkbox"/> | <input type="checkbox"/> |

Other observations:

---

| Survivor 2                                                                                                                                                                                                                 |                          |                          |                          |
|----------------------------------------------------------------------------------------------------------------------------------------------------------------------------------------------------------------------------|--------------------------|--------------------------|--------------------------|
| Ms. B (in her 30s) is A's mother. She is doing her best to comfort her daughter, but her daughter will not stop crying. She is having a difficult time knowing what to do in this situation as it is also chaotic for her. |                          |                          |                          |
| Survivor 2 Checklist                                                                                                                                                                                                       | YES                      | NO                       | Extra Points             |
| Did the psychological worker ask for permission from the mother (Ms. B) to speak with A?                                                                                                                                   | <input type="checkbox"/> | <input type="checkbox"/> | <input type="checkbox"/> |
| Did the psychological worker explain to Ms. B the responses children can have to disaster situations based on their developmental stage?                                                                                   | <input type="checkbox"/> | <input type="checkbox"/> | <input type="checkbox"/> |
| Did the psychological worker advise Ms. B on activities that could calm her daughter down?                                                                                                                                 | <input type="checkbox"/> | <input type="checkbox"/> | <input type="checkbox"/> |

Other observations:

---

## 5. Individual Case Checklist Examples (Fire)

| Survivor 1                                                                                                                                                               |     |    |              |
|--------------------------------------------------------------------------------------------------------------------------------------------------------------------------|-----|----|--------------|
| Mr. A is in his 30s. Mr. A says his wife died from toxic gas. He is yelling while asking where the construction company is and demands punishment for those responsible. |     |    |              |
| Survivor 1 Checklist                                                                                                                                                     | YES | NO | Extra Points |
| Did the psychological worker take Mr. A to a quiet place where he could calm down?                                                                                       |     |    |              |
| (If Mr. A continues to act hostile) Did the psychological worker seek help from other colleagues?                                                                        |     |    |              |
| Did the psychological worker listen so that Mr. A could sufficiently express his grievances and suffering?                                                               |     |    |              |
| Did the psychological worker report Mr. A's demands to the control room?                                                                                                 |     |    |              |
| Did the psychological worker encourage Mr. A to find things he could do in the current situation?                                                                        |     |    |              |
| Did the psychological worker suggest that Mr. A engage in behaviors to take care of himself (e.g., eating, sleeping)?                                                    |     |    |              |
| Did the psychological worker advice Mr. A on follow-up measures (e.g., when he could return for more information, or who could give him information)?                    |     |    |              |

Other observations:

---

| Survivor 10                                                                                                                                       |     |    |              |
|---------------------------------------------------------------------------------------------------------------------------------------------------|-----|----|--------------|
| Ms. J is in her 20s. While crying Ms. J says she is afraid to be alone and asks for help from the psychological personnel.                        |     |    |              |
| Survivor 10 Checklist                                                                                                                             | YES | NO | Extra Points |
| Did the psychological worker check to see if there is a person who can help Ms. J?                                                                |     |    |              |
| Did the psychological worker connect Ms. J with someone who could help her?                                                                       |     |    |              |
| (If Ms. J asks the psychological worker to stay with her). Did the psychological worker stay with her?                                            |     |    |              |
| Did the psychological worker talk with Ms. J about finding the small things she could do herself?                                                 |     |    |              |
| (If it is difficult for the psychological worker to stay with her). Did the psychological worker inquire about someone who could stay with Ms. J? |     |    |              |

Other observations:

---



## Behavioral Checklists (In Korean)

### 1. 생존자용 공통 체크리스트

※ 다음은 심리적 응급처치에서 심리요원이 기본적으로 해야 할 행동 목록입니다.

- 귀하가 만난 심리요원의 ID를 우측 칸에 기입하고, 그들이 귀하에게 한 행동을 평가해 주세요.

| 공통 체크리스트                                                                                        | 심리요원 1 |    | 심리요원 2 |    | 심리요원 3 |    |
|-------------------------------------------------------------------------------------------------|--------|----|--------|----|--------|----|
|                                                                                                 | YES    | NO | YES    | NO | YES    | NO |
| 생존자와 첫 대면을 할 때, 이름, 소속, 역할, 방문 목적을 언급하였는가?                                                      |        |    |        |    |        |    |
| 이야기를 나눌 수 있는지 허락을 구하였는가?                                                                        |        |    |        |    |        |    |
| 생존자를 식별할 수 있는 정보를 질문하였는가? (예: 성함이 어떻게 되시나요?, 어떻게 불러 드리면 좋을까요? 등)                                |        |    |        |    |        |    |
| 필요한 것이 있는지 질문하였는가?                                                                              |        |    |        |    |        |    |
| 현재까지의 상황이 어땠는지 질문하였는가?                                                                          |        |    |        |    |        |    |
| 고통스러워하는 사람에게 위로가 될 만한 것을 제공하였는가?<br>(예, 현장에서 필요한 구조 관련 정보 제공, 필요시 휴지나 물, 음료 제공 등)               |        |    |        |    |        |    |
| 생존자의 이야기에 고개를 끄덕이거나 호응을 하면서 경청하고 있음을 전달하였는가?                                                    |        |    |        |    |        |    |
| 생존자의 심정을 잘 헤아리며 공감적으로 반응하였는가?                                                                   |        |    |        |    |        |    |
| 생존자가 찾는 사람이 있을 경우, 그 사람을 식별할 수 있는 정보를 질문하였는가? (예: 그 분의 성함은 어떻게 되시나요?, 그 분의 인상착의는 어떠한가요? 등)      |        |    |        |    |        |    |
| 생존자에게 현장상황에서 적절하게 행동한 부분에 대해서 피드백을 제공하였는가? (예: 신속하게 대피하신 것은~, 도움을 요청한 것은~, 다른 사람에게 도움을 준 것은~ 등) |        |    |        |    |        |    |
| 생존자의 질문에 대해 사실관계에 기반 하여 대답하였는가?                                                                 |        |    |        |    |        |    |

※ 위 목록에 없지만, 심리요원의 행동 중 도움이 되었다고 생각되는 부분과 도움 되지 않았다고 생각되는 부분이 있다면 작성해 주세요.

| 도움 된 부분 | 도움 되지 않은 부분 |
|---------|-------------|
|         |             |

## 2. 심리요원용 공통 체크리스트

※ 다음은 심리적 응급처치에서 심리요원이 기본적으로 해야 할 행동 목록입니다.

- 귀하가 만났던 생존자의 특징을 우측 칸에 기입하고, 그들에게 귀하가 했던 행동을 평가해 주세요.

| 공통 체크리스트                                                                                        | 생존자 1 |    | 생존자 2 |    | 생존자 3 |    |
|-------------------------------------------------------------------------------------------------|-------|----|-------|----|-------|----|
|                                                                                                 | YES   | NO | YES   | NO | YES   | NO |
| 생존자와 첫 대면을 할 때, 이름, 소속, 역할, 방문 목적을 언급하였는가?                                                      |       |    |       |    |       |    |
| 이야기를 나눌 수 있는지 허락을 구하였는가?                                                                        |       |    |       |    |       |    |
| 생존자를 식별할 수 있는 정보를 질문하였는가? (예: 성함이 어떻게 되시나요?, 어떻게 불러 드리면 좋을까요? 등)                                |       |    |       |    |       |    |
| 필요한 것이 있는지 질문하였는가?                                                                              |       |    |       |    |       |    |
| 현재까지의 상황이 어땠는지 질문하였는가?                                                                          |       |    |       |    |       |    |
| 고통스러워하는 사람에게 위로가 될 만한 것을 제공하였는가? (예, 현장에서 필요한 구조 관련 정보 제공, 필요시 휴지나 물, 음료 제공 등)                  |       |    |       |    |       |    |
| 생존자의 이야기에 고개를 끄덕이거나 호응을 하면서 경청하고 있음을 전달하였는가?                                                    |       |    |       |    |       |    |
| 생존자의 심정을 잘 헤아리며 공감적으로 반응하였는가?                                                                   |       |    |       |    |       |    |
| 생존자가 찾는 사람이 있을 경우, 그 사람을 식별할 수 있는 정보를 질문하였는가? (예: 그 분의 성함은 어떻게 되시나요?, 그 분의 인상착의는 어떠한가요? 등)      |       |    |       |    |       |    |
| 생존자에게 현장상황에서 적절하게 행동한 부분에 대해서 피드백을 제공하였는가? (예: 신속하게 대피하신 것은~, 도움을 요청한 것은~, 다른 사람에게 도움을 준 것은~ 등) |       |    |       |    |       |    |
| 생존자의 질문에 대해 사실관계에 기반 하여 대답하였는가?                                                                 |       |    |       |    |       |    |

※ 위 목록에 없지만, 심리요원의 행동 중 도움이 되었다고 생각되는 부분과 도움 되지 않았다고 생각되는 부분이 있다면 작성해 주세요.

| 도움 된 부분 | 도움 되지 않은 부분 |
|---------|-------------|
|         |             |

### 3. 팀빌딩 체크리스트

※ 다음은 심리적 응급처치의 팀빌딩 과정에서 심리요원들이 해야 할 행동 목록입니다. 우리 팀이 아래의 사항을 수행했는지 리더의 입장에서 평가해 주십시오.

|                  | 공통 체크리스트                                                   | YES | NO |
|------------------|------------------------------------------------------------|-----|----|
| 팀빌딩 & 미션         | 각자의 재난 대응 경험을 공유하였는가?                                      |     |    |
|                  | 각자의 재난 관련 교육 경험을 공유하였는가?                                   |     |    |
|                  | 적절한 기준에 따라 리더를 결정하였는가?                                     |     |    |
|                  | 심리적 응급처치의 기본 정신이나 미션이 무엇인지 회의 과정에서 공유하였는가?                 |     |    |
| 자원               | 주어진 공간을 상황(상황본부, 음료제공, 정보제공, 아이들 쉼터 등)에 맞게 구분하였는가?         |     |    |
|                  | 활용할 수 있는 물품을 파악하였는가?                                       |     |    |
|                  | 물품을 쉼터 상황에 맞게 효율적으로 배분하였는가?                                |     |    |
| 역할               | 각자 맡을 역할에 대해 정보를 공유하였는가?                                   |     |    |
|                  | 역할이 유사한 사람들끼리 모여서 업무 진행 내용을 공유하였는가?                        |     |    |
|                  | 전체 과정을 총괄하는 허브 역할을 할 사람이 존재하는가?                            |     |    |
| 방식               | 팀 역할을 나누는 과정이 자발적/민주적이었는가?                                 |     |    |
|                  | 리더가 솔선하여 어려운 역할을 맡았는가?                                     |     |    |
| 정보제공             | 생존자와 첫 대면을 할 때, 이름, 소속, 역할, 방문 목적을 언급해야 한다는 기본 수칙을 공유하였는가? |     |    |
|                  | 상황에 대해서 간략하게 설명하였는가?                                       |     |    |
|                  | 심리적 응급처치의 지침에 대해서 충분히 이야기를 나누었는가?                          |     |    |
| 과정변인<br>(시뮬레이션을) | 서비스를 제공하는 초반부에 리더 또는 책임감 있는 사람이 재난 상황에 대해 브리핑 하였는가?        |     |    |

|                  |                                                        |  |  |
|------------------|--------------------------------------------------------|--|--|
| 하는 동안 관찰<br>하세요) | 팀원이 보고한 문제 상황(취재활동, 자리 이동, 정보 요구 등)에 대해 적절한 조치를 취하였는가? |  |  |
|                  | 전체 생존자의 연령, 피해 정도를 전체적으로 파악하였는가?                       |  |  |
|                  | 도움을 거절한 생존자에게 일정 간격으로 다시 상태를 확인하는 모습을 보였는가?            |  |  |
|                  | 생존자를 보호하기 위해 언론을 통제하였는가?                               |  |  |

기타 관찰 사항:

팀 빌딩 과정의 장점 / 단점:

#### 4. 개별사례 체크리스트 예시(지진)

|                                                                  |     |    |      |
|------------------------------------------------------------------|-----|----|------|
| 생존자 1                                                            |     |    |      |
| A양은 10살 여자아이이다. A양의 어머니가 계속해서 아이를 달래고 있지만 A양은 울음을 그치지 않는다.       |     |    |      |
| 생존자 1 체크리스트                                                      | YES | NO | 추가점수 |
| 심리요원은 어머니(B씨)에게 A양과 심리요원이 대화를 해도 되는지 허락을 구하였는가?                  |     |    |      |
| 심리요원은 A양과 눈높이를 맞추며 대화를 시도하였는가?                                   |     |    |      |
| 심리요원은 A양이 안전하게 시간을 보낼 수 있는 장소를 안내하였는가?<br>(예: 놀이나 그림 그리기가 가능한 곳) |     |    |      |

기타관찰사항: \_\_\_\_\_

|                                                                                                             |     |    |      |
|-------------------------------------------------------------------------------------------------------------|-----|----|------|
| 생존자 2                                                                                                       |     |    |      |
| B씨는 A양의 어머니이다(30대). 딸을 달래려 최선을 다하고 있지만 아이가 울음을 그치지 않고 있다. B씨는 본인도 혼란스러운 상황에서 아이에게 어떻게 해야 할지 몰라 힘들어 하는 상황이다. |     |    |      |
| 생존자 2 체크리스트                                                                                                 | YES | NO | 추가점수 |
| 심리요원은 B씨(어머니)에게 A양과 심리요원이 대화를 해도 되는지 허락을 구하였는가?                                                             |     |    |      |
| 심리요원은 B씨에게 발달 단계에 따라 재난 후에 아동이 보일 수 있는 반응에 대해서 설명하였는가?                                                      |     |    |      |
| 심리요원은 B씨(어머니)에게 A양을 진정시킬 수 있는 활동들에 대해서 안내했는가?                                                               |     |    |      |

기타관찰사항: \_\_\_\_\_

### 5. 개별사례 체크리스트 예시(화재)

|                                                                                            |     |    |      |
|--------------------------------------------------------------------------------------------|-----|----|------|
| 생존자 1                                                                                      |     |    |      |
| A씨는 30대 남성이다. A씨는 유독가스 때문에 자신의 아내가 죽었다며 시공업체가 어디냐고 소리 지르고 있고, 책임자 처벌을 요구하고 있다.             |     |    |      |
| 생존자 1 체크리스트                                                                                | YES | NO | 추가점수 |
| 심리요원은 A씨가 진정할 수 있도록 조용한 장소로 A씨를 데려갔는가?                                                     |     |    |      |
| (A씨가 계속 흥분된 모습을 보인 경우) 심리요원은 다른 동료에게 도움을 구하였는가?                                            |     |    |      |
| 심리요원은 A씨가 억울함과 고통을 충분히 표현할 수 있도록 들어주었는가?                                                   |     |    |      |
| 심리요원은 A씨의 요구사항을 상황실에 보고하였는가?                                                               |     |    |      |
| 심리요원은 A씨가 현재 이 상황에서 할 수 있는 일을 찾도록 격려했는가?                                                   |     |    |      |
| 심리요원은 A씨가 진정할 수 있도록 조용한 장소로 A씨를 데려갔는가?<br>(예: 식사, 수면)                                      |     |    |      |
| (A씨가 계속 흥분된 모습을 보인 경우) 심리요원은 다른 동료에게 도움을 구하였는가? (예: 언제까지 돌아와서 알려드릴 수 있는지, 누가 알려드릴 수 있는지 등) |     |    |      |

기타관찰사항: \_\_\_\_\_

|                                                              |     |    |      |
|--------------------------------------------------------------|-----|----|------|
| 생존자 10                                                       |     |    |      |
| J씨는 20대 여성이다. J씨는 눈물을 흘리면서 혼자 있는 것이 무섭다고 심리요원에게 도움을 요청하고 있다. |     |    |      |
| 생존자 10 체크리스트                                                 | YES | NO | 추가점수 |
| 심리요원은 J씨에게 도움을 줄 수 있는 사람이 있는지 확인하였는가?                        |     |    |      |
| 심리요원은 J씨에게 도움을 줄 수 있는 사람을 연결시켜주었는가?                          |     |    |      |
| (J씨가 심리요원에게 같이 있어달라고 요구한다면) 같이 있어주었는가?                       |     |    |      |
| 심리요원은 J씨가 작은 일이라도 스스로 할 수 있는 일을 찾을 수 있도록 이야기를 나누었는가?         |     |    |      |
| (심리요원이 함께 있는 것이 힘든 경우) 심리요원은 J씨와 함께 있어 줄 사람을 알아보았는가?         |     |    |      |

기타관찰사항: \_\_\_\_\_
