# Supplementary material for: A preliminary evaluation of the training effects of a didactic and simulation-based psychological first aid program in students and school counselors in South Korea
Source: PubMed Central journal article supplement (PMC5513559; doi:10.1371/journal.pone.0181271), 2017-07-17
Supplement: pone.0181271.s006.pdf [file pone.0181271.s006.pdf]

## **Supporting Information S3 PFA Knowledge Tests**

### PRE-TEST

■ **The following covers psychological first aid (PFA).**

**1. Which of the following should not take place in the rescue phase?**

- ① Restorative environment monitoring
- ② Determining the survivor's current state and needs
- ③ Connected activity with a service group
- ④ Triage (selective evaluation)

**2. Which of the following is the most correct explanation of PFA?**

- ① Professional psychological therapy provided at the beginning of a disaster to prevent after effects.
- ② Carrying out PFA to prevent serious mental problems that all survivors may encounter.
- ③ Carrying out PFA onsite, or in a location close to the site, away from traditional treatment facilities.
- ④ Psychological personnel must provide help above their own expertise and limitations.

**3. Which of the following is the most accurate example of carrying out PFA?**

- ① You observed the situation after arriving at the scene.
- ② Even though you were unsure of the accuracy, you relayed information to the survivor to set them at ease.
- ③ You provided counsel regarding the survivor's grief reaction.
- ④ You relayed the content of the discussion with the survivor to the person in charge.

**4. Which of the following is the most accurate example of carrying out PFA?**

- ① You offered words of comfort such as "everything will be okay."
- ② You maintained eye contact with the translator while conversing with a foreign survivor.
- ③ You clearly enunciated in a low tone while speaking to a survivor with poor hearing.
- ④ You helped a visually impaired person by first taking hold of their arm.

**5. Which of the following is most inappropriate response when attempting to provide information to a survivor as part of PFA?**

- ① Providing information about post-traumatic stress disorder.
- ② Providing information about the current disaster state and situation in the future.
- ③ Providing information about general stress responses.
- ④ Providing information about coping skills.

**6. Regarding the psychological personnel's response after they finish psychological support at the earthquake zone and return to work, which of the following is the most appropriate in coping as a colleague?**

Psychological personnel: I saw a deceased person at the rescue scene. I imagine the fear that person must have felt inside the building, but it's too difficult. How could this have happened? It was truly horrible.

- ① A: True, but what can we do? That person's family and friends must be having a more difficult time than you. Just try and hang in there.
- ② B: It was awful for me too. But things will work out.
- ③ C: Yes. All of the people who assisted at the scene have a drink together and forget about it.
- ④ D: It was really difficult, right? When you had this kind of stress in the past, how did you overcome it?

**7. Which of the following is the most inappropriate response for psychological personnel regarding the family of the deceased?**

- ① Before children enter school, explain the meaning of death to them realistically.
- ② Use the specific name of the deceased family member.
- ③ Consider the safety of the survivor who wants to be alone and prepare a location as private as possible.
- ④ Immediately comfort the survivors who have been informed of the death.

**8. Which of the following is the most inappropriately applied stabilization technique for emotionally overwhelmed survivors?**

- ① Having them close their eyes.
- ② Having them exhale deeply.
- ③ Having them feel their feet touch the ground.
- ④ Having them say the colors of objects in their vicinity.

**9. Which of the following is the most suitable behavior for psychological personnel?**

- ① You devotedly continue to try and help because you feel guilty about taking breaks.
- ② You limit working hours to not exceed 12 hours a day.
- ③ You go out for drinks with your colleagues often to forget about difficult scenes you encountered.
- ④ You do your best with a sense of duty that tells you only you can do it.

**10. List 5 self-care activities to prevent vicarious trauma or exhaustion.**

- ① \_\_\_\_\_
- ② \_\_\_\_\_
- ③ \_\_\_\_\_
- ④ \_\_\_\_\_
- ⑤ \_\_\_\_\_

## POST TEST

### ■ The following content is about psychological first aid (PFA).

**1. Which of the following is the most correct PFA for Mr. A, one of the psychological personnel, to perform following a disaster?**

- ① He went with a friend to the disaster scene to help in any way possible.
- ② He recognized the things he did not know about the survivor's questions regarding compensation.
- ③ He asked survivors, "What symptoms are you currently experiencing?"
- ④ He leaves his family life and occupation behind, and stays at the disaster scene for 1 month.

**2. Which of the following is the most inappropriate intervention for emotionally overwhelmed children?**

- ① Explain that these situations can be surprising for adults also.
- ② Give advice to the parents for calming the child while pointing out their mistakes.
- ③ Place the child next to the parents and first have them calm the child.
- ④ Perform relaxation techniques with the child if the parents are unable to bear the situation.

**3. Which of the following is the most inappropriate behavior for the first meeting with a survivor?**

- ① Continue speaking to a survivor who refuses help.
- ② Report to an institution that a child survivor has been abused.
- ③ Respect the choice of the survivor who rejects help.
- ④ Reveal your name and affiliation to the survivor and ask if it is okay to have a conversation.

**4. Which of the following is the most appropriate response from psychological personnel in performing PFA with a child who lost their parents in a plane accident?**

- ① "I think I know how you feel having lost your parents."
- ② "Do you have any relatives, brothers, or sisters from whom you can get help?"
- ③ "This is a very sad situation, but you're lucky to have an older sister."
- ④ "Your parents would be so proud if they saw how you're holding up."

**5. Which of the following is the most appropriate response from psychological personnel in PFA?**

- ① Have the survivor get the latest information related to the disaster from the Internet or TV.
- ② Comfort the survivor and relieve their sense of guilt by saying, "Maybe this was for the best."
- ③ Explain the danger to the survivor who says they will go out and find their missing family and dissuade them from doing so.
- ④ Explain, in detail, the situation to the child wondering about the current disaster state.

**6. Which of the following is the most appropriate coping method in a situation where a body needs to be identified?**

- ① Explain, in detail, to the family of the deceased the state in which the body was found and the suffering they went through at the time of death.
- ② Do not inform the child if they ask specifically about the corpse of their deceased parent(s).
- ③ Tell the family of the deceased about coping methods when they are informed of the death.
- ④ Try your best to answer religious or spiritual questions the survivor might have.

**7. Which of the following is the most appropriate intervention for survivors in PFA?**

- ① Ask specific questions about the disaster experience and collect sufficient information for follow-up measures.
- ② Consider all of the solutions for the several concerns the survivor mentions.
- ③ Arrange a small group in which survivors can form relationships with each other.
- ④ As a member of the psychological personnel, take action on behalf of the survivor in problem solving.

**8. Which of the following is the furthest away from a situation requiring psychiatric referral?**

- ① When there is an alcohol or drug use problem
- ② When existing mental problems are worsening
- ③ When the survivor says they are having nightmares 2 weeks after the accident
- ④ When the survivor requests help

**9. Which of the following is not a measure an institution needs to take in order to protect psychological personnel?**

- ① Job rotation based on the level of work stress
- ② Recruiting a few seasoned experts that can provide PFA
- ③ Giving leave to psychological personnel who have participated over a certain amount of hours
- ④ Implementing periodic evaluations of personnel with high levels of stress

**10. List 5 self-care activities to prevent vicarious trauma or exhaustion.**

- ⑥ \_\_\_\_\_
- ⑦ \_\_\_\_\_
- ⑧ \_\_\_\_\_
- ⑨ \_\_\_\_\_
- ⑩ \_\_\_\_\_

## PFA Knowledge Tests (In Korean)

### PRE-TEST

■ 다음은 심리적 응급처치(PFA)에 관한 내용입니다.

1. 다음 중 구출단계에서 해야 하는 개입과 거리가 가장 먼 것은?

- ① 회복환경 모니터링
- ② 생존자의 현재 상태와 욕구 파악
- ③ 봉사단체와 연계된 활동
- ④ 트리아지(선별 평가)

2. 다음 중 심리적 응급처치에 대한 가장 옳은 설명은?

- ① 재난 초기에 후유증을 예방하기 위한 전문적인 심리치료이다.
- ② 모든 생존자가 심한 정신적 문제를 겪을 수 있으므로, 이를 예방하기 위해 실시된다.
- ③ 전통적인 치료기관에서 벗어나 현장 또는 현장에서 가까운 곳에서 실시된다.
- ④ 심리요원은 자신의 전문성과 한계 이상으로 생존자에게 도움을 줘야 한다.

3. 다음 중 심리적 응급처치를 가장 올바르게 실시한 것은?

- ① 현장에 도착한 후 우선 상황을 관찰했다.
- ② 확실하지 않지만 생존자를 안심시키기 위해 정보를 전달했다.
- ③ 생존자의 애도반응에 대한 상담을 제공했다.
- ④ 생존자와 나눈 이야기를 책임자에게 전달했다.

4. 다음 중 심리적 응급처치를 가장 올바르게 실시한 것은?

- ① "다 잘 될 거예요"라고 위로의 말을 건넸다.
- ② 외국인 생존자와 대화하면서 통역사를 쳐다보면서 대화했다.
- ③ 청력이 좋지 않은 생존자에게 낮은 톤으로 명확하게 발음했다.
- ④ 시각장애인의 팔을 잡고 먼저 부축해주었다.

5. 다음 중 심리적 응급처치의 일부로 생존자들에게 정보를 제공하려고 할 때, 가장 부적절한 반응은?

- ① 외상 후 스트레스 장애에 대한 정보
- ② 현재까지 재난 상황과 앞으로의 상황에 대한 정보
- ③ 일반적인 스트레스 반응에 대한 정보
- ④ 대처 기술에 대한 정보

6. 지진 현장에서 심리지원을 마치고 직장에 복귀한 심리요원의 반응이다. 다음 중 동료로서 가장 적절한 대처는?

심리요원: 구조 현장에서 사망자를 봤어요. 그 사람이 그 건물 안에서 겪었을 공포를 상상하니 너무 힘들어요. 어떻게 이런 일이 일어날 수 있죠? 너무 끔찍했어요.

- ① A: 맞아요. 그래도 어찌겠어요. 그 사람의 가족과 지인은 당신보다 더 힘들 거예요. 조금만 더 힘내세요.
- ② B: 저도 너무 끔찍했어요. 그래도 잘 해결될 거예요.
- ③ C: 네. 현장 지원을 다녀온 사람들끼리 술 한 잔하고 잊어버립시다.
- ④ D: 많이 힘들었죠? 이런 스트레스가 있었을 때 전에는 어떤 방식으로 극복하셨나요?

7. 다음 중 가족이 사망한 생존자에 대한 심리요원의 반응 중 가장 부적절한 것은?

- ① 취학 전 아동에게 죽음의 의미에 대해 사실적으로 알려준다.
- ② 사망한 가족의 이름을 구체적으로 사용한다.
- ③ 혼자 있고 싶어 하는 생존자에게 안전을 고려하여 가능한 사적인 장소를 마련해준다.
- ④ 사망 소식을 들은 생존자를 즉시 위로한다.

8. 다음 중 정서적으로 압도된 생존자에게 안정화 기법을 가장 부적절하게 적용한 것은?

- ① 눈을 감도록 한다.
- ② 깊게 숨을 내쉬도록 한다.
- ③ 발이 땅에 닿는 느낌을 느껴보도록 한다.
- ④ 주변에 보이는 물건의 색깔을 말하게 한다.

9. 다음 중 심리요원의 행동으로 가장 바람직한 것은?

- ① 휴식을 취하는 것이 미안해서 헌신적으로 돕는다.
- ② 근무 시간이 하루 12시간을 넘지 않도록 제한한다.
- ③ 힘들었던 장면을 잊기 위해 동료들과 자주 술자리를 가진다.
- ④ 나만 할 수 있는 일이라는 사명감을 갖고 최선을 다한다.

10. 대리외상이나 소진을 예방하기 위한 자기 돌봄 활동 5가지를 적으시오.

- ① \_\_\_\_\_
- ② \_\_\_\_\_
- ③ \_\_\_\_\_
- ④ \_\_\_\_\_
- ⑤ \_\_\_\_\_

POST TEST

■ 다음은 심리적 응급처치(PFA)에 관한 내용입니다.

1. 다음 중 재난 발생 후, 심리요원 A씨가 행한 심리적 응급처치로 가장 옳은 것은?

- ① 뭐든 도움이 되고자, 재난 현장에 친구와 들어서 갔다.
- ② 보상에 관한 생존자의 질문에 모르는 부분임을 인정했다.
- ③ 생존자에게 "현재 어떤 증상을 경험하고 있나요?"라고 질문했다.
- ④ 가정생활과 생업을 뒤로 한 채, 한 달째 현장을 지키고 있다.

2. 다음 중 정서적으로 압도된 아동에게 가장 부적절한 개입은?

- ① 아동에게 이런 상황에서 어른들도 놀랄 수 있음을 설명한다.
- ② 아동을 진정시키고 있는 부모에게 잘못을 지적하면서 조언한다.
- ③ 아동을 부모 곁으로 데려가 부모가 우선 아동을 진정시키도록 한다.
- ④ 부모가 상황을 감당하지 못할 경우, 아동에게 이완 기법을 시행한다.

3. 다음 중 생존자와의 첫 대면에서 가장 부적절한 행동은?

- ① 도움을 거부하는 생존자에게 계속 말을 건다.
- ② 아동 생존자가 학대 받은 사실을 기관에 보고한다.
- ③ 도움을 거절하는 생존자의 의사를 존중한다.
- ④ 생존자에게 이름과 소속을 밝히고 이야기를 나눌 수 있는지 묻는다.

4. 다음 중 비행기 사고로 부모를 잃은 청소년과의 심리적 응급처치에서 심리요원의 반응 중 가장 적절한 것은?

- ① 부모를 잃은 네 기분이 어떤 지 알 것 같아.
- ② 혹시 도움을 받을 수 있는 친척이나 형제, 자매가 있니?
- ③ 지금 이 상황이 너무 슬프지만, 그나마 누나가 있어서 불행 중 다행이야.
- ④ 고인들께서 이렇게 잘 견디고 있는 모습을 본다면, 대견해하실 것 같아.

5. 다음 중 심리적 응급처치에서 심리요원의 가장 적절한 반응은?

- ① 인터넷이나 TV를 통해 생존자가 재난 관련 최신 정보를 얻도록 한다.
- ② "아마도 이게 최선이었을 거예요"라고 위로하며 생존자의 죄책감을 덜어준다.
- ③ 실종 가족을 찾겠다고 나서는 생존자에게 위험성을 알리고 만류한다.
- ④ 현재 재난 상황에 대해 궁금해 하는 어린 아동에게 상황을 자세하게 설명한다.

6. 다음 중 시신 확인이 필요한 상황에서 가장 적절한 대처는?

- ① 유가족에게 사망자의 발견 상태와 사망 당시 고통에 대해 상세하게 알려준다.
- ② 아이들이 사망한 부모의 사체에 대해 구체적으로 물을 경우 알려주지 않는다.
- ③ 사망 소식을 전해들은 유가족 옆에서 도움이 되는 대처 방법에 대해 말해준다.
- ④ 생존자가 종교적, 영적 질문을 할 경우, 나름대로 답을 하려고 노력한다.

7. 다음 중 심리적 응급처치에서 생존자에 대한 가장 적절한 개입은?

- ① 재난 경험에 대해 자세하게 질문하여 후속 조치를 위한 충분한 정보를 수집한다.
- ② 생존자가 언급한 여러 가지 걱정들에 대한 해결책을 한꺼번에 고려한다.
- ③ 생존자들이 서로 관계를 형성하도록 소규모 집단을 주선한다.
- ④ 심리요원이 생존자 대신 문제 해결을 위한 행동을 취한다.

8. 다음 중 정신과 의뢰가 필수적인 상황과 가장 거리가 먼 것은?

- ① 술이나 약물 사용 문제가 있을 때
- ② 기존의 정신적 문제가 악화될 때
- ③ 사고 2주 후 악몽을 꾸다고 호소할 때
- ④ 생존자 본인이 의뢰를 요구할 때

9. 다음 중 심리요원을 보호하기 위해 기관이 취해야 할 조치가 아닌 것은?

- ① 업무의 스트레스 수준에 따라 순환 근무
- ② 심리적 응급처치를 제공할 수 있는 소수 정예의 전문 인력 모집
- ③ 일정 기간 이상 참여한 심리요원에게 휴가 부여
- ④ 스트레스가 높은 요원에 대한 주기적인 평가 실시

10. 대리외상이나 소진을 예방하기 위한 자기 돌봄 활동 5가지를 적으시오.

- ① \_\_\_\_\_
- ② \_\_\_\_\_
- ③ \_\_\_\_\_
- ④ \_\_\_\_\_
- ⑤ \_\_\_\_\_
