# Supplementary material for: A preliminary evaluation of the training effects of a didactic and simulation-based psychological first aid program in students and school counselors in South Korea
Source: PubMed Central journal article supplement (PMC5513559; doi:10.1371/journal.pone.0181271), 2017-07-17
Supplement: pone.0181271.s007.pdf [file pone.0181271.s007.pdf]

## Supporting Information S4

### Perceived Willingness, Preparedness, and Confidence

※ The following are questions regarding how you would act and feel in the event of a future disaster. Please check the box you feel most suits you.

1. If any of the following disasters were to occur in the community you live, would you be **willing** to provide psychological assistance (e.g. psychological first aid) to survivors?

| No. | Disaster Type | Degree of Willingness |                 |               |          |                   |
|-----|---------------|-----------------------|-----------------|---------------|----------|-------------------|
|     |               | 0<br>Not at all       | 1<br>Not really | 2<br>Somewhat | 3<br>Yes | 4<br>Very much so |
| 1   | Earthquake    |                       |                 |               |          |                   |
| 2   | Fire          |                       |                 |               |          |                   |
| 3   | Typhoon       |                       |                 |               |          |                   |
| 4   | Explosion     |                       |                 |               |          |                   |

2. If any of the following disasters were to occur in the community you live, would you be **prepared** to provide psychological assistance (e.g. psychological first aid) to survivors?

| No. | Disaster Type | Level of Preparation |                 |               |          |                   |
|-----|---------------|----------------------|-----------------|---------------|----------|-------------------|
|     |               | 0<br>Not at all      | 1<br>Not really | 2<br>Somewhat | 3<br>Yes | 4<br>Very much so |
| 1   | Earthquake    |                      |                 |               |          |                   |
| 2   | Fire          |                      |                 |               |          |                   |
| 3   | Typhoon       |                      |                 |               |          |                   |
| 4   | Explosion     |                      |                 |               |          |                   |

3. If any of the following disasters were to occur in the community you live, would you be **confident (competent)** in providing psychological assistance (e.g. psychological first aid) to survivors?

| No. | Disaster Type | Level of Confidence (Competence) |                 |               |          |                   |
|-----|---------------|----------------------------------|-----------------|---------------|----------|-------------------|
|     |               | 0<br>Not at all                  | 1<br>Not really | 2<br>Somewhat | 3<br>Yes | 4<br>Very much so |
| 1   | Earthquake    |                                  |                 |               |          |                   |
| 2   | Fire          |                                  |                 |               |          |                   |
| 3   | Typhoon       |                                  |                 |               |          |                   |
| 4   | Explosion     |                                  |                 |               |          |                   |

## Perceived Willingness, Preparedness, and Confidence (In Korean)

※ 다음은 미래의 재난발생 시 귀하가 어떻게 행동하고 느끼실 지에 관한 질문들입니다. 가장 적합하다고 생각되는 칸에 체크해 주십시오.

1. 만일 귀하가 거주하는 지역사회에서 다음과 같은 재난이 발생한다면 현장에서 생존자들에게 심리적 지원 (예: 심리적 응급처치)을 제공할 **의향**이 있으십니까?

| 번호 | 재난 내용 | 의향의 정도     |            |         |         |             |
|----|-------|------------|------------|---------|---------|-------------|
|    |       | 0<br>전혀 없음 | 1<br>별로 없음 | 2<br>보통 | 3<br>있음 | 4<br>상당히 있음 |
| 1  | 지진    |            |            |         |         |             |
| 2  | 화재    |            |            |         |         |             |
| 3  | 태풍    |            |            |         |         |             |
| 4  | 폭발사고  |            |            |         |         |             |

2. 만일 귀하가 거주하는 지역사회에서 다음과 같은 재난이 발생한다면 현장에서 생존자들에게 심리적 지원 (예: 심리적 응급처치)을 제공할 **준비**가 되어 있습니까?

| 번호 | 재난 내용 | 준비 정도             |             |             |            |                     |
|----|-------|-------------------|-------------|-------------|------------|---------------------|
|    |       | 0<br>전혀 안되어<br>있음 | 1<br>아직 부족함 | 2<br>보통 정도임 | 3<br>되어 있음 | 4<br>상당히 잘<br>되어 있음 |
| 1  | 지진    |                   |             |             |            |                     |
| 2  | 화재    |                   |             |             |            |                     |
| 3  | 태풍    |                   |             |             |            |                     |
| 4  | 폭발사고  |                   |             |             |            |                     |

3. 만일 귀하가 거주하는 지역사회에서 다음과 같은 재난이 발생한다면 현장에서 생존자들에게 심리적 지원 (예: 심리적 응급처치)을 제공할 **자신감(유능감)**이 있습니까?

| 번호 | 재난 내용 | 자신감(유능감) 정도 |             |             |         |             |
|----|-------|-------------|-------------|-------------|---------|-------------|
|    |       | 0<br>전혀 없음  | 1<br>아직 부족함 | 2<br>보통 정도임 | 3<br>있음 | 4<br>상당히 있음 |
| 1  | 지진    |             |             |             |         |             |
| 2  | 화재    |             |             |             |         |             |
| 3  | 태풍    |             |             |             |         |             |
| 4  | 폭발사고  |             |             |             |         |             |
